# Supplementary material for: Coral Bleaching Induced Mortality Transforms Local and Global Carbon Cycles: An Unrecognized Feedback Loop That May Accelerate Reef Decline
Source: Copernicus journal article supplement (doi:10.5194/egusphere-2023-779), 2023-05-08
Supplement: Supplementary file 1 [file egusphere-2023-779-supplement.pdf]

1        **Coral Bleaching Induced Mortality Transforms Local and Global Carbon Cycles: A**  
2        **Positive Feedback Loop That May Accelerate Reef Decline**

3        **Authors:** Sarah Seabrook , Adrienne M.S. Correa, Dennis Conetta, Carsten G.B. Grupstra,  
4        Lauren I. Howe-Kerr, Kaitlin McConnell, Emily R. Schmeltzer, Rebecca Vega Thurber, Andrew  
5        R. Thurber

6        **Supplementary Methods**

7        **Study Site:**

8        All parts of this study were conducted at the Mo'orea Coral Reef Long-Term Ecological  
9        Research (MCR-LTER) station on the island of Mo'orea in French Polynesia (-17.475, -149.837)  
10       on the forereef on the north shore of the island, using LTER sites between 5-10m depth with high  
11       coral cover, and all near-reef and off-reef samples following the steep slope out from the reef to  
12       1 km where depths exceed 500m.

13       **Field Sampling for Bleaching Event:**

14       Water was collected during the initial onset of the bleaching event on April 1, 2019, before  
15       temperatures peaked. Water chemistry was then sampled following the most intense temperature  
16       peaks (April 28 - May 15, 2019). Collections occurred at 1m, 5m, and 10m depths over a 10m  
17       deep site on the forereef that has been sampled for over a decade as part of the LTER station  
18       time series sampling (LTER-1). Samples were taken at three points along a transect that ran  
19       parallel to the reef, separated by 15m. Upon collection, samples were stored on ice until  
20       processing in the lab, with no more than 2 hours elapsing between sampling and processing.

21       **Quantification of Bleaching extent:**

22       Images of the Mo'orea fore reef that included scale bars were annotated using ImageJ as either  
23       bleached (completely white), partially bleached (contained some pigment but had clear areas of  
24       bleaching), or unlikely to be bleaching (no visible white spots beyond normal for the species).  
25       The surface area of each was quantified through tracing the exterior of individual corals and

26 summing across the plots which were between 46 and 93 m<sup>2</sup> apiece with three areas of the  
27 forereef measured, corresponding to MCR LTER sites 0, 1, and 2. The resolution of the images  
28 was such that individual species could be easily identified.

### 29 **Mesocosm Experimental Design and Sampling:**

30 Corals were collected at 5m depth on the forereef at 3 sites (upslope from LTER sites: LTER0,  
31 LTER1, and LTER2). A coral colony was collected (as a whole) via chisel and hammer, placed  
32 in a plastic bag and transported in a cooler back to the research station. The colony was then  
33 fragmented into ca. 2cm x 2cm fragments and allowed 24 hours acclimation time in a running  
34 seawater table in partial shade. During the evening, hypoxia was avoided by lightly bubbling the  
35 tanks and keeping a low density of corals per container. After acclimation, corals were placed in  
36 individual closed systems (the ‘mesocosm’) which consisted of a 500ml glass jar (PTFE lined  
37 lid) that was connected to mylar bags (1.0 L) and circulated with a peristaltic pump continuously  
38 throughout the experiment. This design allowed for a large enough water reservoir to avoid  
39 nighttime hypoxia, while also allowing enough sunlight exposure to facilitate natural cycles of  
40 photosynthesis. These systems were cleaned between replicates with acid washing, a methanol  
41 rinse, and a final rinse and soaking with MilliQ water. Each mesocosm was filled with filtered  
42 seawater (FSW; 0.2 µm). Corals were exposed to 3 treatments: no modification, +3°C  
43 temperature increase (controlled with thermistors and quantified by ONSET Hobo temperature  
44 recorders), and coral exudate. The coral exudate was created by forcing bleaching of coral  
45 fragments (from the same colony that was used for the given replicate) in sterile containers filled  
46 with FSW via exposure to temperature and light stress for 24 hours. After separating the filtrate  
47 from other material by passing it through a coarse, non-quantitative filter to remove particulates  
48 and mucus aggregations, we diluted the concentrated exudate and added 0.5 L of the exudate to  
49 each treatment.

### 50 **DOC concentration measurement**

#### 51 Sample processing

52 Water samples for DOC analysis from both field sampling and the mesocosm experiment were  
53 filtered through pre-combusted (450°C for 5 hr) 25mm GFF filters, with the filtrate stored in

54 acid-leached, MilliQ flushed, sample rinsed 60 mL polyethylene bottles at  $<-20^{\circ}\text{C}$ . DOC samples  
55 were sent to the Nutrient Analytical Services at the Chesapeake Biological Laboratory of the  
56 University of Maryland Center for Environmental Science.

57 Samples were acidified and sparged with ultra-pure carrier-grade air to drive off inorganic  
58 carbon and analyzed using the high-temperature combustion ( $680^{\circ}\text{C}$ ) method on a Shimadzu  
59 TOC-L following operating procedures outlined in (Total and Dissolved Organic Carbon  
60 Method: <https://www.umces.edu/nasl/methods>). In short, all carbon compounds are broken down  
61 into  $\text{CO}_2$  which is carried by ultra-pure air to a non-dispersive infrared detector (NDIR) for  
62 detection. The system was calibrated before and after each run with potassium hydrogen  
63 phthalate standards (6-point curve, 0-20 mg C/L) and referenced against a certified reference  
64 control sample (Scp Science Accuspec Toc Standard), a spike (20 ppm) and a blank every 10  
65 samples. The acceptance criteria used was 0.995.

#### 66 **Symbiodiniaceae photosynthetic efficiency**

67 The  $F_v/F_m$ , or photosynthetic efficiency, of Symbiodiniaceae cells within dark-adapted coral  
68 fragments was measured using a diving Pulse Amplitude Modulated (PAM) Fluorometer (Walz  
69 Diving PAM) at five time points per experimental replicate ( $t=0, 6, 12, 24, \text{ and } 48$  hours). Corals  
70 were placed in  $0.2\ \mu\text{m}$  FSW within dark-adaptation boxes for 20 minutes prior to measurements  
71 to ensure that the Photosystem II of Symbiodiniaceae cells had entered a relaxed state. At each  
72  $T_0$ , four control fragments and one temperature and one coral exudate fragment were measured  
73 ( $n = 6$  total). Three of these control fragments were subsequently sacrificed for isolation of  
74 genomic material and measurement of Symbiodiniaceae densities and chlorophyll concentrations  
75 (see subsequent sections). At all time points, one fragment per treatment (control, temperature  
76 and coral exudate,  $n = 3$  total) was measured and then sampled for downstream analyses.

77 PAM fluorometry measurements were conducted in the dark using the following instrument  
78 settings: pulse width of 0.8s, light intensity of 12, signal dampening of 2, and a gain of 5. The  
79 “measure light intensity” parameter was set to 3. The PAM fluorometer was auto-zeroed in  
80 darkness, and then measurements were taken with the beam probe at 5 mm from each coral  
81 surface. Three separate fluorometry measurements were collected per coral fragment, each on a

82 different area of the coral. Changes in Fv/Fm were analyzed using a 1-way ANOVA with Tukey  
83 Posthoc test with time as the independent factor in SigmaPlot 11.

#### 84 **Categorical Coral Health**

85 In addition to the below referenced quantitative measures of bleaching, we used an observational  
86 categorical evaluation of the level of bleaching undergone by the corals based on imagery. We  
87 used a course scale from 1-5: (5) Coral appears healthy with no obvious signs of bleaching; (4)  
88 Coral appears partially lighter in color than T<sub>0</sub> control corals; (3) Areas of blotchy tissue and/or  
89 obvious partial bleaching of part of the coral; (2) Coral is completely bleached; (1) Coral tissue  
90 has begun to slough off indicating a dead coral individual. These rankings were based on the  
91 images (images provided in Fig. S5) and were used as a metric of bleaching due to the inherent  
92 and high variability across replicates which sometimes obscured visually obvious patterns of  
93 coral health. Significance of these patterns was analyzed through a 1-way ANOVA with time as  
94 the independent variable. A tukey posthoc test was used in the case of a significant result.

#### 95 **Symbiodiniaceae chlorophyll concentration and cell densities**

96 Sacrificed coral fragments were stored at -40°C. After thawing, an airbrush supplied with 0.02  
97 µm FSW was used to blast coral tissue into a sterile 200 ml whirlpak. The blastate was then  
98 homogenized using a Fisherbrand 150 handheld homogenizer (Waltham, Massachusetts) for ten  
99 seconds at full speed. To measure chlorophyll concentrations, four 1 mL aliquots of  
100 homogenized blastate were transferred to 1.5 ml centrifuge tubes, and centrifuged for 3 min at  
101 15,000g to form a concentrated symbiont pellet that was immediately frozen at -40°C. Pellets  
102 were subsequently resuspended in 1 ml of 90% acetone, sonicated at 40% amplitude, and placed  
103 in the dark. After 24 hours, 250µl of this solution was loaded in triplicate into a 96-well plate and  
104 absorbance at 630nm, 647nm, and 664nm was recorded. The concentrations of chlorophyll a and  
105 chlorophyll c2 were calculated using equations from (Jeffrey & Humphrey, 1975) New  
106 spectrophotometric equations for determining chlorophyll a, b, c1 and c2 in higher plants, algae  
107 and natural phytoplankton and normalized to fragment surface area.

108 To quantify Symbiodiniaceae cell densities, two 250µl aliquots of the homogenized blastate (see  
109 above) were transferred to 2 ml cryotubes with 250µl of 10% formaldehyde in 0.02 µm-filtered

110 seawater and stored at 4°C. The remaining volume of blastate was measured using a 2 ml  
111 serological pipette; total volume of blastate was used to calibrate chlorophyll concentrations and  
112 cell densities with coral fragment surface area. Symbiodiniaceae cells were counted using light  
113 microscopy (20X) and a Neubauer hemocytometer. Cell concentrations were counted in sixteen  
114 replicate squares (N=4 technical replicates/sample) and the concentration per ml blastate was  
115 normalized to fragment surface area.

### 116 **Coral fragment surface area**

117 After tissue blasting, a mean of 75 pictures were taken of each coral fragment using an iPhone 6  
118 at a 10° and 60° angle. The pictures were loaded into Agisoft Metashape (St. Petersburg, Russia)  
119 and processed using the following settings: Photos were aligned using generic preselection at the  
120 highest accuracy setting, excess points were then removed manually, a dense cloud was  
121 constructed using the high accuracy option, a mesh was constructed using ‘dense cloud, high  
122 face count’ as the source data, and a texture was applied using the ‘Generic - Mosaic’ setting.  
123 Four markers were then placed in the scene at known distances, and three scale bars were added  
124 between them. Any remaining model area that was not part of the coral fragment was manually  
125 removed, and surface areas were measured using the ‘Measure area and volume’ option.

### 126 **Symbiodiniaceae genetic diversity**

127 Coral tissue samples were preserved in DNA/RNA shield and DNA was extracted using the  
128 ZymoBIOMICS DNA/RNA Miniprep Kit (Zymo Research, Irvine, CA) and sequenced on the  
129 Illumina MiSeq Platform using Symbiodiniaceae Internal Transcribed Spacer-2 (ITS-2) specific  
130 primers (Sym\_VAR\_5.8SII and Sym\_VAR\_REV, 32). The PCR reaction contained 5µl of DNA  
131 (5ng/µl), 2.5µl of SYM\_VAR\_5.8SII + MiSeq Adapter, 2.5µl of SYM\_VAR\_REV + MiSeq  
132 Adapter (2 µM), 12.5µl 2x KAPA HiFi HotStart ReadyMix, and 2.5µl of molecular grade water  
133 for a total reaction volume of 25µl. PCR cycles were as follows: 95°C for 3 min, 15 cycles of  
134 95°C for 30 sec, 56°C for 30 sec, and 72°C for 30 sec, and 72°C for 4 min. PCR clean-up was  
135 completed using Agencourt AMPure XP Magnetic Beads. Illumina indexing primers were added  
136 to 50µl of purified PCR product, and a new PCR was run to incorporate unique barcodes. The  
137 PCR reaction contained 5µl of cleaned PCR product, 5µl of Illumina Indexed Primer 1 (i5), 5µl

138 of Illumina Indexed Primer 2 (i7), 25 $\mu$ l 2x KAPA HiFi HotStart, and 10 $\mu$ l PCR Grade water for  
139 a total reaction volume of 50 $\mu$ l. PCR cycles were as follows: 95°C for 3 min, 20 cycles of 95°C  
140 for 30 sec, 56°C for 30 sec, and 72°C for 30 sec, and lastly 72°C for 4 min. The resulting PCR  
141 product was purified with Agencourt AMPure XP Magnetic Beads. Samples were quantified via  
142 qPCR using the KAPA library quantification kit and normalized and pooled in equimolar  
143 amounts. Pooled samples were sequenced on the Illumina MiSeq platform using a PE300 run  
144 with 25% PhiX at the Georgia Genomics and Bioinformatics Core (University of Georgia,  
145 Athens, GA).

146 Demultiplexed fastq files were generated with Illumina's BaseSpaceFS (version 1.5.964) and  
147 reads were processed in RStudio (version 1.1.456) using the DADA2 pipeline (version 1.11.0,  
148 Callahan *et al.* 2016.) with modifications for the Symbiodiniaceae ITS-2 region. Samples with  
149 fewer than 10,000 reads ( $n = 2$ ) were removed from the dataset. The DADA2 pipeline generated  
150 a table of amplicon sequence variants (ASVs) which was then curated via the LULU pipeline,  
151 which uses co-occurrence patterns and sequence similarity to eliminate erroneous ASVs (Frøslev  
152 *et al.*, 2017). Symbiodiniaceae ITS-2 types were then assigned based on BLAST results to a local  
153 Symbiodiniaceae ITS-2 database (Cunning *et al.*, 2017).

## 154 **Data Visualization**

155 Contour plots of DOC concentrations were made in Ocean data viewer (v.5.1.7) using the DIVA-  
156 gridding algorithm and interpolating to 30x30 scale-length grid, which has been indicated as  
157 reliable for avoiding over-interpolation. Comparisons were made to data collected as part of the  
158 MCR-LTER time series sampling (and data replotted from Nelson *et al.*, 2011). These later data  
159 are measurements of total organic carbon (TOC), of which the particulate pool is a small  
160 proportion of (3-5%) and differences between reef and offshore concentrations have been shown  
161 to not be significantly driven by the particulate pool. Therefore, we treat these TOC values as  
162 DOC as has been done previously (Nelson *et al.*, 2011). Data from the mesocosm experiments  
163 were averaged across replicates per species to give a representative view of behavior of each  
164 coral species throughout the experiment. Responses relative to specific replicates are given in SI  
165 Figure 4. We used ggplot2 in R to produce the base heatmaps, boxplots, and remaining data  
166 visualization.

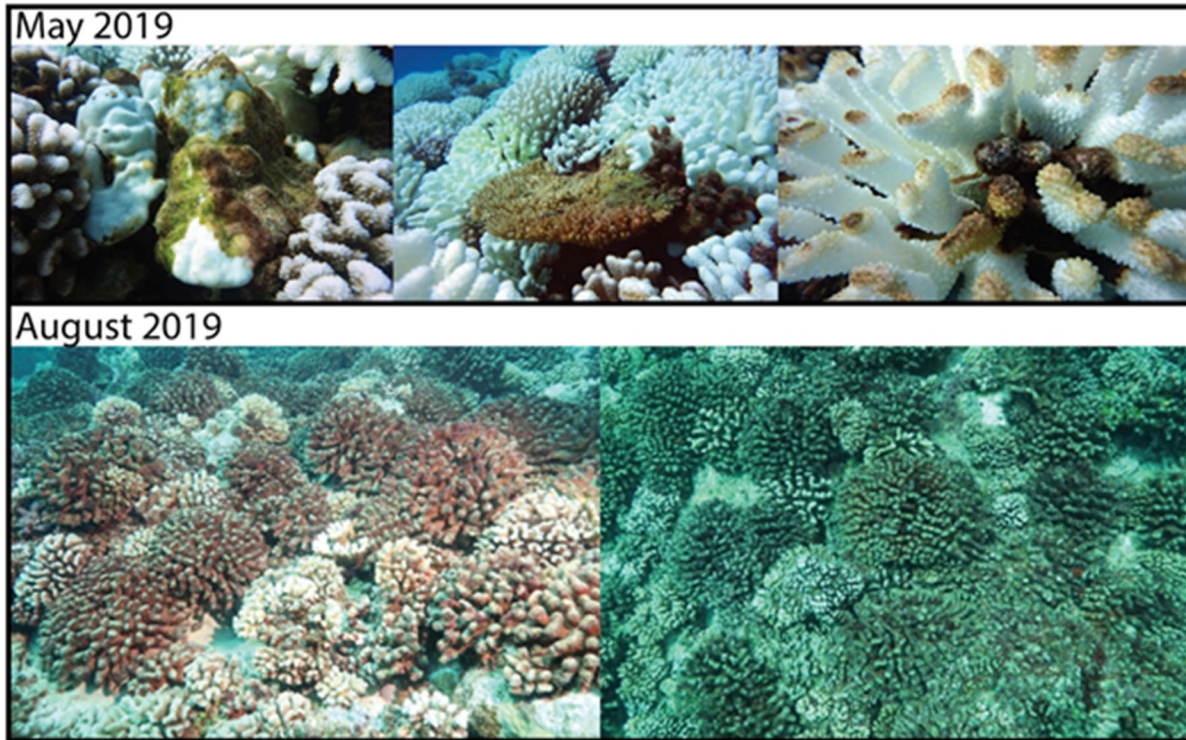

168

169 **Fig. S1:** The progression of macroalgal overgrowth following the April 2019 bleaching event,  
170 from patchy areas on distinct colonies (May 2019) to whole colonies across the reef-scape  
171 (August 2019). In May of 2019, significant portions of bleached colonies remained alive (stark  
172 white areas). Light to dark brown areas had died and were overgrown by macroalgae. By August  
173 of 2019, many colonies had experienced full mortality and were completely overgrown by  
174 macroalgae (brown colonies).

175

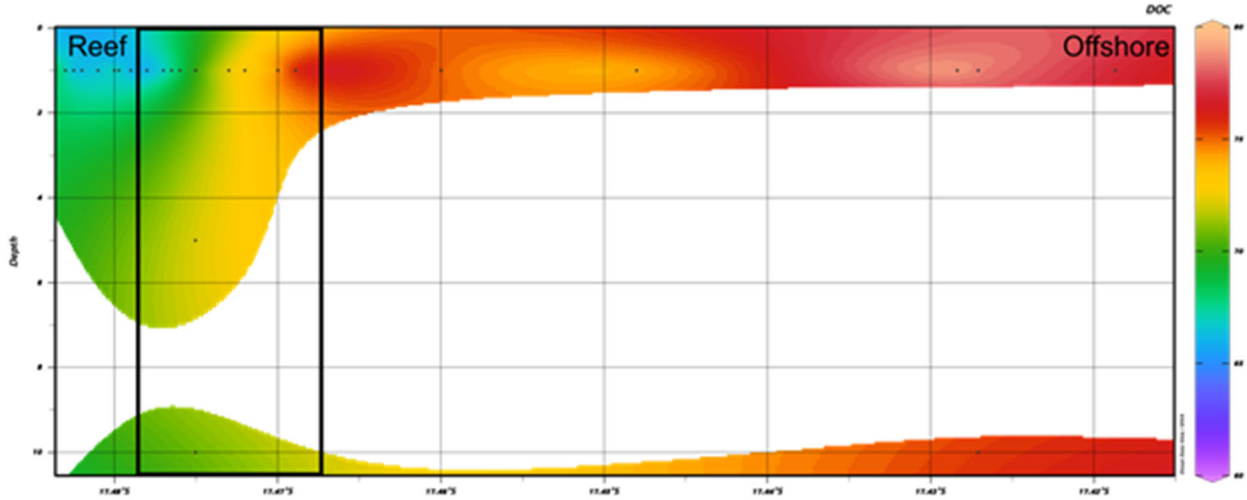

176

177

178 **Fig. S2:** Full range of DOC data for the combined data set, going out 5km from the reef crest.

179 Black box indicates the range plotted in Figure 1.

180

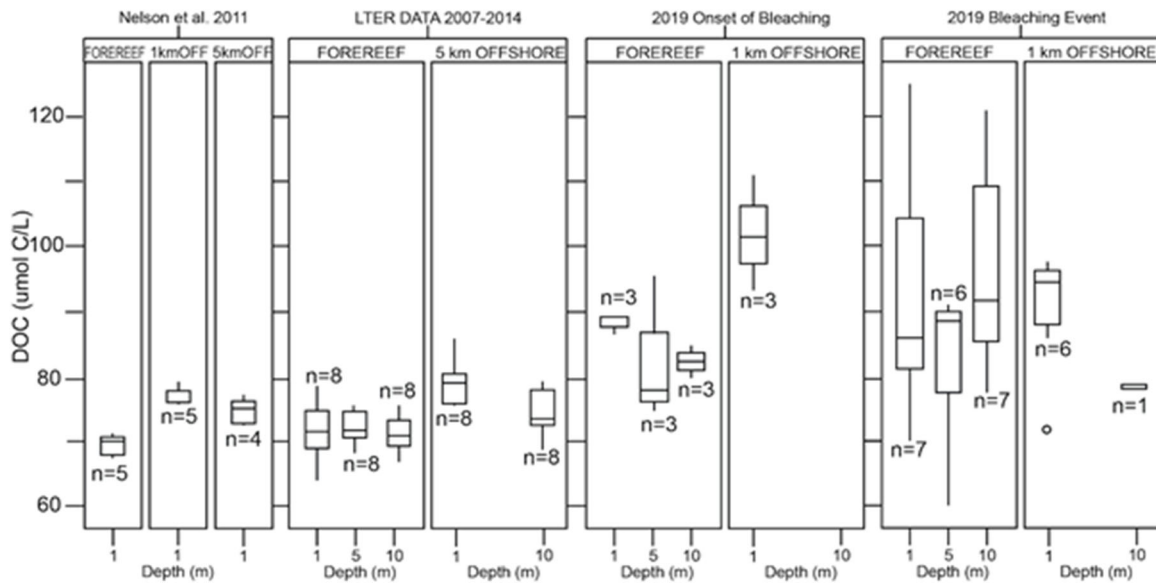

181

182 **Fig. S3:** DOC concentrations across the datasets used for forereef and offshore gradients. The

183 number of samples within each group is indicated.



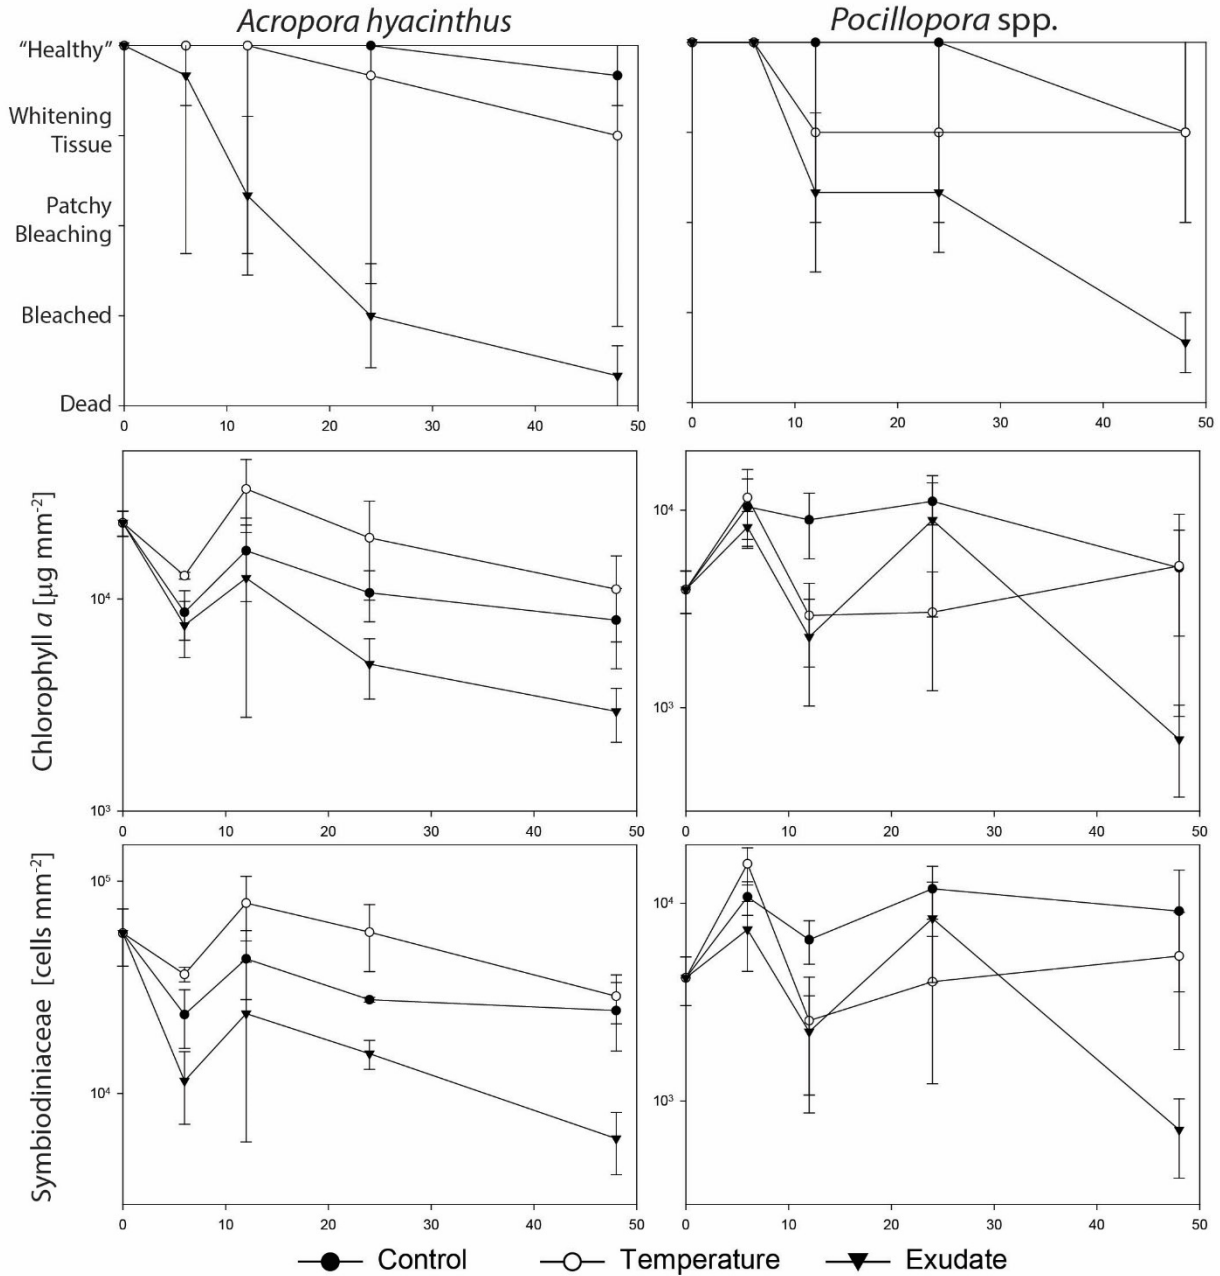

184

185 **Fig. S4:** Impact of experiments on coral bleaching state (top), concentration of Chlorophyll a  
 186 within the coral holobiont tissues (middle), and density of Symbiodiniaceae (bottom) in *A.*  
 187 *hyacinthus* (left) and *Pocillopora* spp. (right). Error bars are Standard Error except for T6 for  
 188 *Pocillopora* spp. where only 2 replicates were carried out, and error bars are the range. Coral  
 189 health used a 1-5 scale based on consensus opinion observations from no apparent divergence  
 190 from T0 control to increasingly bleached with “dead” defined as tissue sloughed off. For  
 191 comparison, images of each individual for each treatment are provided in Fig. S5.

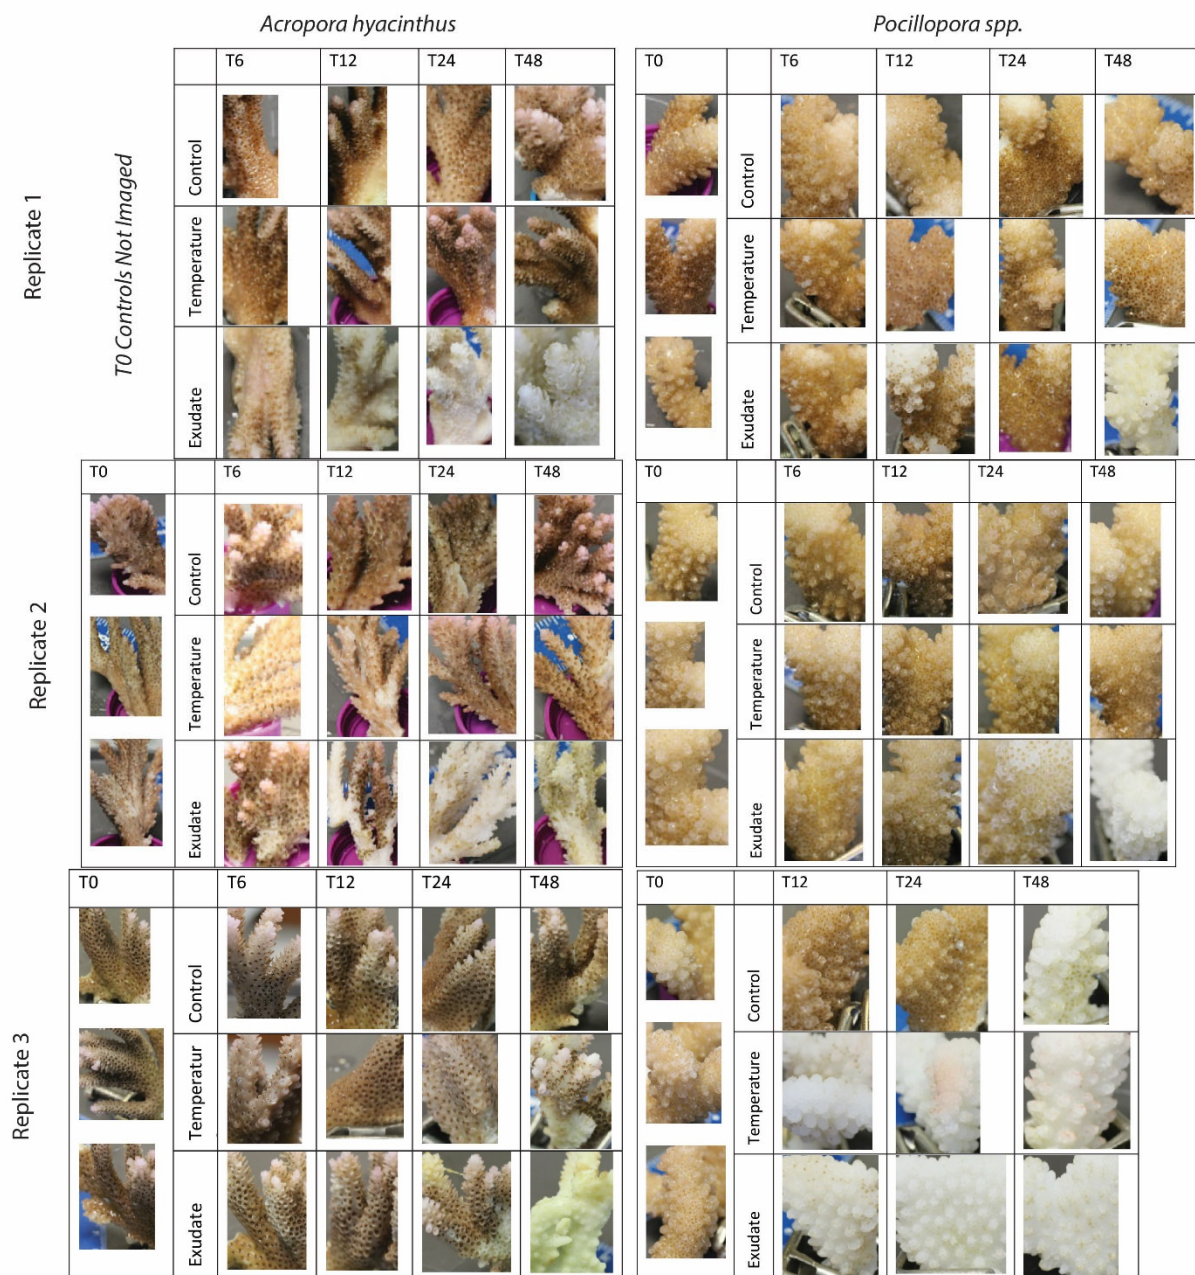

192

193 **Fig. S5.** Impact of temperature and exudate stress on two species of corals as displayed by  
 194 imagery of each of the individual nubbins sampled for each treatment.

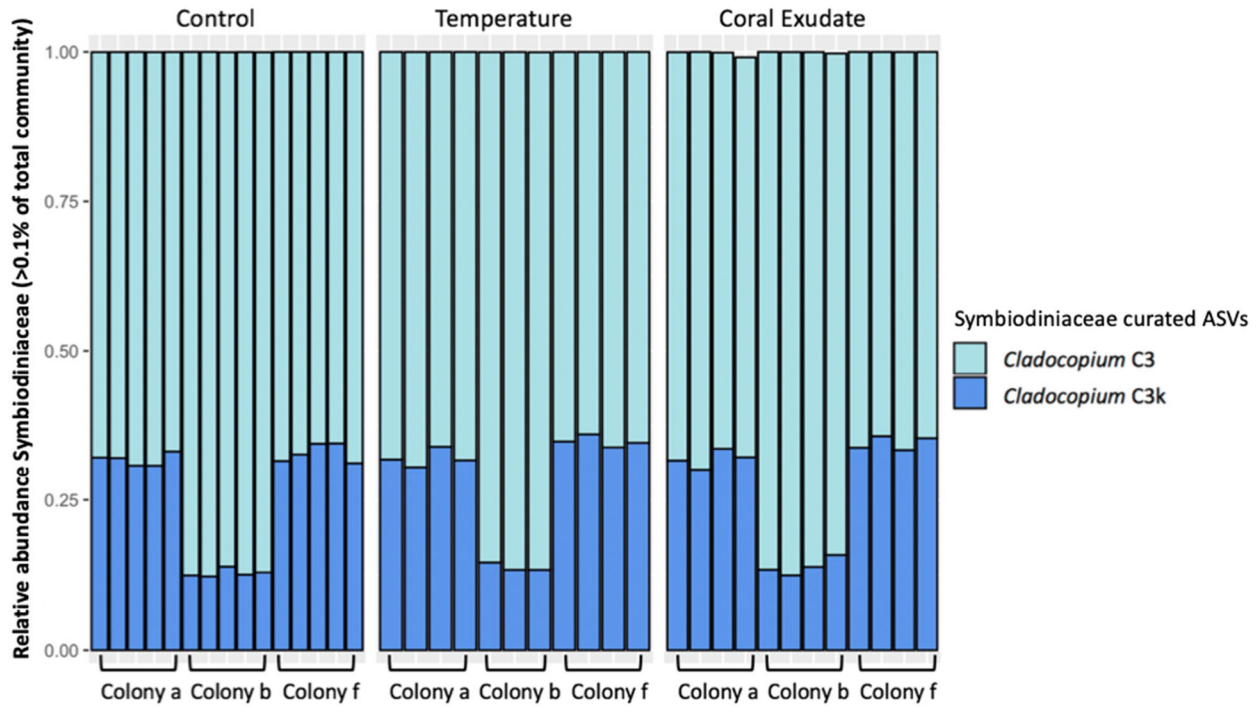

195

196 **Fig. S6:** Relative abundance of the dominant (>0.1% of total community) Symbiodiniaceae  
 197 curated amplicon sequence variants (ASVs) based on the internal transcribed spacer-2 (ITS-2)  
 198 region of rDNA in fragments of three *Acropora hyacinthus* genets exposed to high temperature  
 199 (+3°C), coral exudate (+ ~2mM DOC), or ambient (control, ~27°C) conditions. The identities of  
 200 curated Symbiodiniaceae ASVs were assigned based on BLAST results to a local  
 201 Symbiodiniaceae ITS-2 database (Cunning et al., 2017): *Cladocopium C3* (NCBI Accession #:  
 202 AB778606), *Cladocopium C3k* (NCBI Accession #: AY589737). Each coral fragment is  
 203 interpreted as containing a single Symbiodiniaceae species in the genus *Cladocopium*; within this  
 204 species, the *Cladocopium C3* and C3k curated ASVs are interpreted as intragenomic variants  
 205 (Davies et al. *in review*). Fragments within the same colony and treatment were sampled at up to  
 206 five timepoints over a 48-hour period, and are ordered here from earliest to latest per genet.

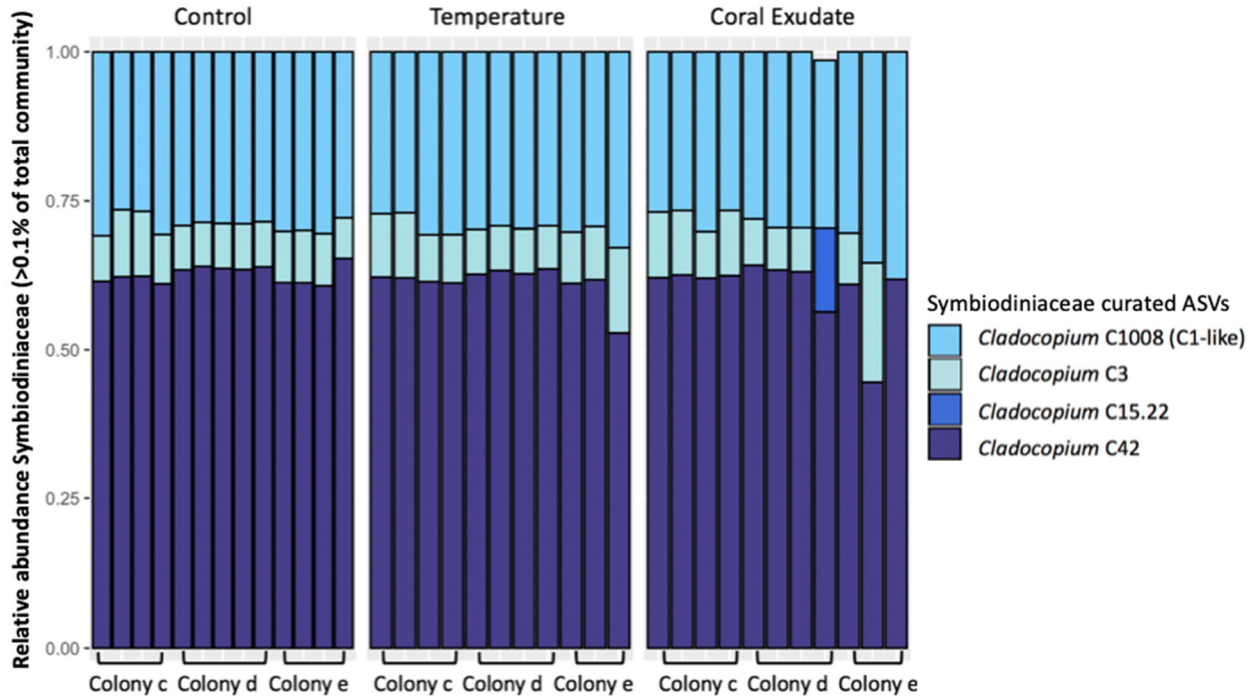

207

208 **Fig. S7:** Relative abundance of the dominant (>0.1% of total community) Symbiodiniaceae  
 209 curated amplicon sequence variants (ASVs) based on the internal transcribed spacer-2 (ITS-2)  
 210 region of rDNA in fragments of three *Pocillopora* genotypes exposed to high temperature  
 211 (+3°C), coral exudate (+ ~2mM DOC), or ambient (control, ~27°C) conditions. The identities of  
 212 curated Symbiodiniaceae ASVs were assigned based on BLAST results to a local  
 213 Symbiodiniaceae ITS-2 database (Cunning et al., 2017): *Cladocopium* C1008 (C1-like, Cunning  
 214 et al., 2015, NCBI Accession #: DQ480613), *Cladocopium* C3 (NCBI Accession #: AB778606),  
 215 *Cladocopium* C15.22 (NCBI Accession #: KC597695), *Cladocopium* C42 (NCBI Accession #:  
 216 AY765402). Coral fragments are interpreted as containing a single Symbiodiniaceae species in  
 217 the genus *Cladocopium*; curated ASVs within each sample are likely intragenomic variants  
 218 (Davies et al. *in review*). The rightmost fragment of colony d in the coral exudate treatment may  
 219 contain a different *Cladocopium* symbiont than the rest of the fragments, but this cannot be fully  
 220 resolved from the sequence data available. Fragments within the same colony and treatment were  
 221 sampled at up to five-time points over a 48-hour period, and are ordered here from earliest to  
 222 latest per genet.

223

224 Table S1: ANOVA results identifying difference in Coral Health Categorical Variables,  
 225 Symbiodiniaceae (Symbiont) density, and Chlorophyll *a* Density as impacted by the various  
 226 treatments over time. Significant 2 way interactions meant that a 2-way ANOVA was not  
 227 informative and so 1 way ANOVAs were run with Tukey post-hoc tests across time. Degrees  
 228 Freedom varied among tests due to time points missing the required 3 replicates for an  
 229 informative test. Statistics were run in SigmaPlot 11 and '=' in the post-hoc results indicates no  
 230 significant difference, not necessarily equivalence.

| <b>Fv/Fm</b>               | <i>Statistic</i>                 | <i>Post-hoc results</i>                                                                                                                  |
|----------------------------|----------------------------------|------------------------------------------------------------------------------------------------------------------------------------------|
| <i>Pocillopora</i> spp.    |                                  |                                                                                                                                          |
| Control                    | F <sub>4,36</sub> =0.8, p=0.554  | Non-significant test                                                                                                                     |
| Temperature                | F <sub>4,15</sub> =0.8, p=0.560  | Non-significant test                                                                                                                     |
| Exudate                    | F <sub>4,15</sub> =5.8, p=0.005  | [T <sub>0</sub> =T <sub>6</sub> ] ≠ T <sub>48</sub>                                                                                      |
| <i>Acropora hyacinthus</i> |                                  |                                                                                                                                          |
| Control                    | F <sub>4,26</sub> =2.2, p=0.100  | Non-significant test                                                                                                                     |
| Temperature                | F <sub>4,16</sub> =0.6, p=0.640  | Non-significant test                                                                                                                     |
| Exudate                    | F <sub>4,16</sub> =12.7, p<0.001 | [T <sub>0</sub> =T <sub>6</sub> ] ≠ [T <sub>12</sub> =T <sub>24</sub> =T <sub>48</sub> ] except T <sub>6</sub> =T <sub>24</sub>          |
| <b>Categorical Health</b>  |                                  |                                                                                                                                          |
| <i>Pocillopora</i> spp.    |                                  |                                                                                                                                          |
| Control                    | F <sub>3,14</sub> =1.9, p=0.169  | Non-significant test                                                                                                                     |
| Temperature                | F <sub>3,14</sub> =1.2, p=0.357  | Non-significant test                                                                                                                     |
| Exudate                    | F <sub>3,14</sub> =16.2, p<0.001 | All pairwise comparisons significant                                                                                                     |
| <i>Acropora hyacinthus</i> |                                  |                                                                                                                                          |
| Control                    | F <sub>3,13</sub> =1.4, p=0.303  | Non-significant test                                                                                                                     |
| Temperature                | F <sub>3,13</sub> =3.0, p=0.06   | Non-significant test                                                                                                                     |
| Exudate                    | F <sub>3,13</sub> =15.6, p<0.001 | [T <sub>0</sub> =T <sub>6</sub> ] ≠ [T <sub>24</sub> =T <sub>48</sub> ]&T <sub>0</sub> ≠T <sub>12</sub> &T <sub>6</sub> =T <sub>12</sub> |
| <b>Symbiont Density</b>    |                                  |                                                                                                                                          |
| <i>Pocillopora</i> spp.    |                                  |                                                                                                                                          |
| Control                    | F <sub>3,13</sub> =1.8, p=0.203  | Non-significant test                                                                                                                     |
| Temperature                | F <sub>3,13</sub> =0.4, p=0.868  | Non-significant test                                                                                                                     |
| Exudate                    | F <sub>3,13</sub> =2.1, p=0.156  | Non-significant test                                                                                                                     |
| <i>Acropora hyacinthus</i> |                                  |                                                                                                                                          |
| Control                    | F <sub>4,15</sub> =1.2, p=0.344  | Non-significant test                                                                                                                     |
| Temperature                | F <sub>4,15</sub> =0.8, p=0.522  | Non-significant test                                                                                                                     |
| Exudate                    | F <sub>3,13</sub> =2.4, p=0.118  | Non-significant test                                                                                                                     |
| <b>Chlorophyll a</b>       |                                  |                                                                                                                                          |
| <i>Pocillopora</i> spp.    |                                  |                                                                                                                                          |
| Control                    | F <sub>3,13</sub> =2.8, p=0.090  | Non-significant test                                                                                                                     |
| Temperature                | F <sub>3,13</sub> =0.2, p=0.881  | Non-significant test                                                                                                                     |
| Exudate                    | F <sub>3,13</sub> =1.6, p=0.235  | Non-significant test                                                                                                                     |
| <i>Acropora hyacinthus</i> |                                  |                                                                                                                                          |
| Control                    | F <sub>4,16</sub> =3.0, p=0.050  | No significant Post-hoc (T <sub>0</sub> =T <sub>48</sub> @p=0.11)                                                                        |
| Temperature                | F <sub>3,13</sub> =1.2, p=0.32   | Non-significant test                                                                                                                     |
| Exudate                    | F <sub>3,13</sub> =4.0, p=0.031  | No significant Post-hoc (T <sub>0</sub> =T <sub>48</sub> @p=0.08)                                                                        |

231 **Table S2:** DOC concentrations during bleaching experiment with three dominant coral types  
 232 collected in Mo'orea, French Polynesia. Healthy corals were collected during May 09-13, 2019  
 233 and experiments were run until bleaching was observed (24-48 hours).

|                            | Control DOC (mmol C/cm <sup>2</sup> ± SE) | Bleached DOC (mM C/cm <sup>2</sup> ± SE) |
|----------------------------|-------------------------------------------|------------------------------------------|
| <i>Pocillopora</i> spp.    | 0.44±0.17 (n=3)                           | 1.74±0.24 (n=5)                          |
| <i>Pocillopora eydouxi</i> | 0.40±0.02 (n=2)                           | 3.13±1.00 (n=3)                          |
| <i>Porites lobata</i>      | 0.13±0.01 (n=3)                           | 2.52±0.45 (n=2)                          |
| No Coral Blank (mM C)      | 0.32±0.04 (n=3)                           |                                          |
| AVERAGE                    | 0.31±0.07 (n=8)                           | 2.3±0.35 (n=10)                          |

234 **Table S3:** DOC release by non-bleaching corals

| Coral Type                        | Citation           | um/dm/day | mmol/m/day | mmol/cm <sup>2</sup> /day |
|-----------------------------------|--------------------|-----------|------------|---------------------------|
| Pocillopora                       | Haas et al 2013    |           | 1.32       | 1.32E-04                  |
| Mean (multiple coral types incl.) | Naumann et al 2012 |           | 2.2        | 2.20E-04                  |
| Porties                           | Haas et al 2011    | 55.2      | 0.0552     | 5.52E-04                  |
| AVERAGE                           |                    |           |            | 3.01E-04                  |

235 **Table S4:** Reef surface area values

| Reef Surface Area                             |                 |                 |         |
|-----------------------------------------------|-----------------|-----------------|---------|
|                                               | km <sup>2</sup> | cm <sup>2</sup> | 10%     |
| Great Barrier Reef (Harris et al 2013)        | 20,678          | 2.07E+14        |         |
| Current Coral Coverage (Costanza et al. 2014) | 280,000         | 2.8E+15         | 2.8E+14 |

236 **Equation 1:** Calculations for amount of DOC released in non-bleaching conditions

$$237 \quad 3.01e^{-4} \frac{\text{mmolC}}{\text{cm}^2} \times 2.8e^{15} \text{cm}^2 = 8.44e^{11} \text{mmolC} = 8.44e^8 \text{molC}$$

238

239

240

241 **Equation 2:** Calculations for amount of DOC released if 10% of corals bleach

$$242 \quad 2.3 \frac{\text{mmolC}}{\text{cm}^2} \times 2.8e^{14} \text{cm}^2 = 6.44e^{14} \text{mmolC} = 6.44e^{11} \text{molC}$$

243 **Table S5: Determination of percentage of area bleached during 2016-2017 bleaching event**  
 244 **based on Hughes et al., 2017**

| Great Barrier Reef Bleaching 2016      |          |          |          |          |
|----------------------------------------|----------|----------|----------|----------|
| Percent Bleached                       | 1%       | 10%      | 30%      | 60%      |
| 20% SA Bin                             | 0.00     | 0.02     | 0.06     |          |
| 40% SA Bin                             |          |          |          | 0.24     |
| Sum of Bins                            |          |          |          | 0.32     |
|                                        |          |          |          |          |
| SA Bleached                            | 0.01     | 0.10     | 0.30     | 0.60     |
| 20% SA Bin                             | 4.14E+11 | 4.14E+12 | 1.24E+13 |          |
| 40% SA Bin                             |          |          |          | 4.96E+13 |
| Sum of Bins (cm <sup>2</sup> bleached) |          |          |          | 6.66E+13 |

245 **Equation 3:** DOC Release from 2016-2017 bleaching event

$$246 \quad 2.3 \frac{\text{mmolC}}{\text{cm}^2} \times 6.66e^{13} \text{cm}^2 = 1.53e^{14} \text{mmolC} = 1.53e^{11} \text{molC}$$

247

248 **Supplemental Literature Cited.**

- 249 Callahan B. J., McMurdie P. J., Rosen M. J., Han A. W., Johnson A. J. A. & Holmes S. P.  
 250 (2016). DADA2: High-resolution sample inference from Illumina amplicon data. *Nature*  
 251 *methods*, 13(7), 581–583.
- 252 Cunning R., Gates R. D. & Edmunds P. J. (2017). Using high-throughput sequencing of ITS2 to  
 253 describe Symbiodinium metacommunities in St. John, US Virgin Islands. *PeerJ*, 5,  
 254 e3472.
- 255 Davies, S.; Gamache, M.H.; Howe-Kerr, L.I.; Kriefall, N.G.; Baker, A.C.; Banaszak, A.T.; Bay,  
 256 L.K.; Bellantuono, A.J.; Bhattacharya, D.; Chan, C.X.; Claar, D.C.; Coffroth, M.A.;  
 257 Cunning, R.; Davy, S.K.; del Campo, J.; Diaz-Almeyda, E.M.; Frommlet, J.C.; Fuess,  
 258 L.E.; Gonzalez-Pech, R.A.; Goulet, T.L.; Hoadley, K.D.; Howells, E.J.; Hume, B.C.C.;

- 259 Kemp, D.W.; Kenkel, C.D.; Kitchen, S.A.; LaJeunesse, T.C.; Lin, S.; McIlroy, S.;  
260 McMinds, R.; Nitschke, M.R.; Oakley, C.A.; Peixoto, R.S.; Prada, C.; Putnam, H.M.;  
261 Quigley, K.; Reich, H.G.; Reimer, J.D.; Rodriguez-Lanetty, M.; Rosalás, S.; Saad, O.S.;  
262 Sampayo, E.M.; Santos, S.; Shoguchi, E.; Smith, E.G.; Stat, M.; Stephens, T.G.; Strader,  
263 M.E.; Suggett, D.J.; Swain, T.D.; Tran, C.; Traylor-Knowles, N.; Voolstra, C.R.;  
264 Warner, M.E.; Weis, V.M.; Wright, R.; Xiang, T.; Yamashita, H.; Ziegler, M.; Correa,  
265 A.M.; Parkinson, J.E. Building Consensus around the Assessment and Interpretation of  
266 Symbiodiniaceae Diversity. Preprints 2022, 2022060284 (doi:  
267 10.20944/preprints202206.0284.v1).
- 268 Frøslev T. G., Kjøller R., Bruun H. H., Ejrnæs R., Brunbjerg A. K., Pietroni C. & Hansen A. J.  
269 (2017). Algorithm for post-clustering curation of DNA amplicon data yields reliable  
270 biodiversity estimates. *Nature communications*, 8(1), 1188.
- 271 Hughes, T. P., Kerry, J., Álvarez-Noriega, M., et al. (2017). Global warming and recurrent mass  
272 bleaching of corals. *Nature* 543, 373–377
- 273 Jeffrey S. W. & Humphrey G. F. (1975). New spectrophotometric equations for determining  
274 chlorophylls a, b, c1 and c2 in higher plants, algae and natural phytoplankton. *Biochemie  
275 und Physiologie der Pflanzen: BPP*, 167(2), 191–194.
- 276 Nelson C. E., Alldredge A. L., McCliment E. A., Amaral-Zettler L. A. & Carlson C. A. (2011).  
277 Depleted dissolved organic carbon and distinct bacterial communities in the water  
278 column of a rapid-flushing coral reef ecosystem. *The ISME journal*, 5(8), 1374–1387
